# Supplementary material
Source: PubMed Central journal article supplement (PMC8422282)
Supplement: NIHMS1712135-supplement-1.pdf [file NIHMS1712135-supplement-1.pdf]

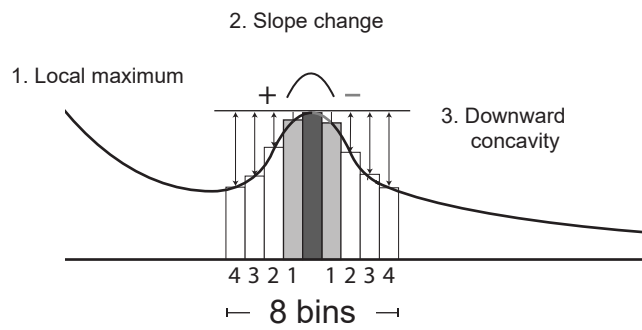

**Supplementary Figure 1**

Representative SNpr-MCx High Beta/Low Gamma STWAs

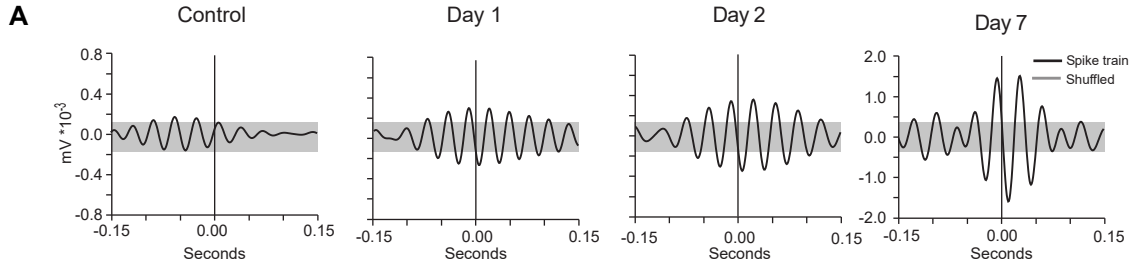

**B** 6-OHDA Lesioned (Cannula) Spike-LFP Phase Distributions

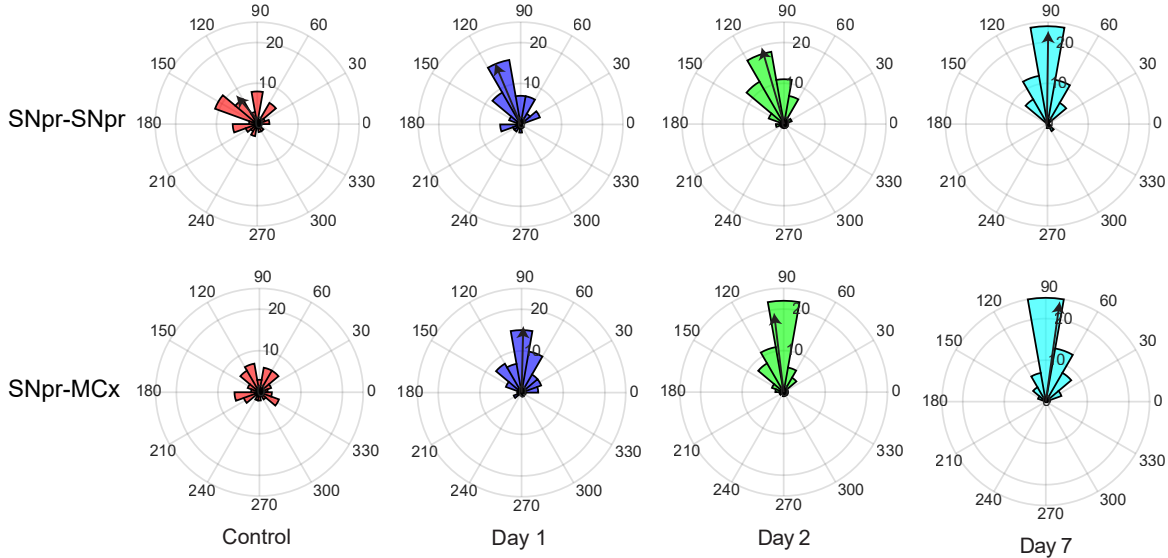

D1/D2 Antagonist (Catalepsy) Spike-LFP Phase Distributions

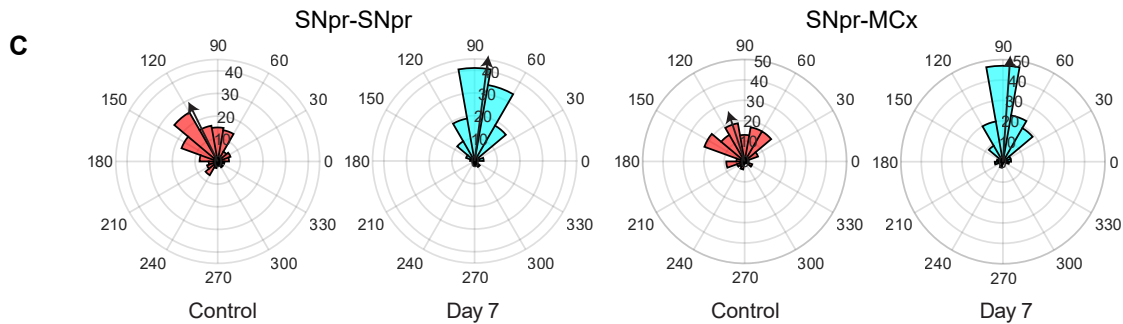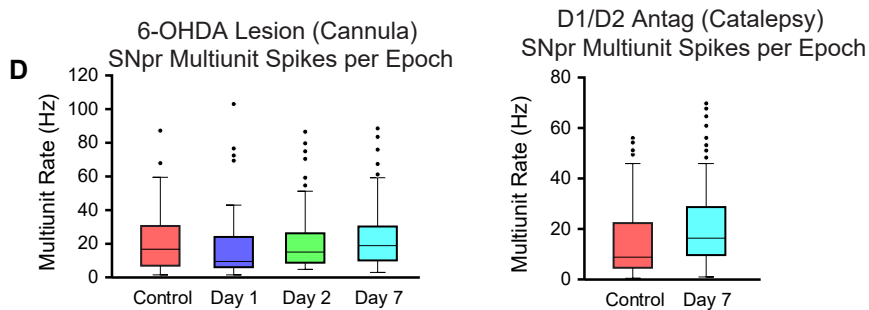

Supplementary Figure 2
